# Supplementary material for: Saturation indices of aqueous mineral phases as proxies of seasonal dynamics of a transitional water ecosystem using a geochemical modeling approach
Source: Springer Nature journal article supplement (doi:10.1007/s40808-020-00910-x), 2020-08-02
Supplement: MOESM1 [file 40808_2020_910_MOESM1_ESM.docx]

**SUPPLEMENTARY MATERIAL**

A1 Major mineral phases predicted by PHREEQC in the present investigation and notes on their significance to coastal lagoon environment

| **Mineral Phases (from PHREEQC)** | **Composition** | **Description** | **Major influencing factors in a lagoon environment** | **References and examples** |
| --- | --- | --- | --- | --- |
| Aragonite | CaCO3 | Polymorph of Calcium carbonate | Flooding, evaporation, Total dissolved solids, pH, alkalinity | Butler (1969); Mucci (1983) |
| Calcite | CaCO3 | Polymorph of Calcium carbonate | Flooding, evaporation, Total dissolved solids, pH, alkalinity | Butler (1969); Mucci (1983) |
| Chalcedony | SiO2 | Silicon, oxygen; cryptocrystalline form of quartz | low pH and high silica | Umeda (2003) |
| Chrysotile | Mg3Si2O6(OH)4 | Magnesium silicate serpentine material with alternating stacking of Mg(OH)2 and silica | pH and natural organic matter | Bales and Morgan (1985) |
| Dolomite | CaMg(CO3)2 | Anhydrous Calcium magnesium carbonate | Organic Matter (OM), microbial activity, algal mats, Total dissolved solids, sulphates, pH, alkalinity, dissolution and re-precipitation cycles with calcite and aragonite | Butler (1969); Kendall (1978); Vascaoncelos et al. (1995) |
| Gypsum | CaSO4·2H2O | Stable Calcium sulfate | Flooding, evaporation, Chlorinity, Total dissolved solids, pH, alkalinity | Butler (1969); Kendall (1978) |
| Halite | NaCl | Isometric crystals of rock salt | Flooding, evaporation, Chlorinity, Total dissolved solids, pH, alkalinity | Butler (1969); Kendall (1978) |
| Hydroxyapatite | Ca10(PO4)6(OH)2 | Hydroxyl endmember of the apatite group | pH, dissolved phosphate ions, OM, co-precipitation effect with calcite | Lopez and Morgui (1992); Avile et al. (2006) |
| Quartz | SiO2 | Mineral with SiO4 silicon–oxygen tetrahedra | Flooding, evaporation, pH, alkalinity | Wagner and Togt (1973); Vascaoncelos et al. (1995) |
| Sepiolite | Mg4Si6O15(OH)2·6H2O | Complex magnesium silicate clay from marine environments | Flooding, evaporation, pH, alkalinity, closely related to the cycling of Mg-calcite in seawater | Kadir and Akbulut (1991); Yan et al. (2005) |
| Sepiolite (d) |
| SiO2 | SiO2 | Oxide of silicon, usually found in the form of quartz | Flooding, evaporation, pH, alkalinity | Wagner and Togt (1973); Vascaoncelos et al. (1995) |
| Sylvite | KCl | Potassium chloride crystals | Secondary evaporite similar to halite, formed during evaporition in lagoons | Garcia-Veigas et al. (2009) |
| Talc | Mg3Si4O10(OH)2 | Hydrated magnesium silicate clay mineral | Formed during dolomite-magnesite precipitation | Rouse and Sherif (1980); Nishihara (1956) |

**References:**

1. Aviles A, Rodero J, Amores V, et al (2006) Factors controlling phosphorus speciation in a Mediterranean basin (River Guadalfeo, Spain). J Hydrol 331:396–408 . doi: 10.1016/j.jhydrol.2006.05.024
2. Bales RC, Morgan JJ (1985) Surface Charge and Adsorption Properties of Chrysotile Asbestos in Natural Waters. Environ Sci Technol 19:1213–1219 . doi: 10.1021/es00142a013
3. Butler GP (1969) Modern evaporite deposition and geochemistry of coexisting brines, The Sabkha, Trucial Coast, Arabian Gulf. J Sediment Petrol 39:70–89
4. García-veigas J, Rosell L, Zak I, et al (2009) Evidence of potash salt formation in the Pliocene Sedom Lagoon ( Dead Sea Rift , Israel ). Chem Geol 265:499–511 . doi: 10.1016/j.chemgeo.2009.05.013
5. Kadir S, Akbulut A (2001) Occurrence of sepiolite in the hirsizdere sedimentary magnesite deposit, bozkurt-denizli, sw turkey. Carbonates and Evaporites 16:17–25
6. Kendall AC (1978) Continental and Supratidal (Sabkha) Evaporites. In: Geoscience Canada. pp 66–78
7. López P, Morguí JA (1992) Phosphate and calcium carbonate saturation in a stratified coastal lagoon. Hydrobiologia 228:55–63 . doi: 10.1007/BF00006476
8. Mucci A (1983) The Solubility of calcite and aragonite in seawater at various salinities, temperatures and one atmosphere total pressure. Am J Sci 283:780–799
9. Nishihara H (1956) Origin of the bedded magnesite deposits of Manchuria. Econ Geol 51:698–711
10. Rouse JE, Sherif N (1980) Major evaporite deposition from groundwater remobilized salts. Nature 285:470–472
11. Umeda M (2003) Precipitation of silica and formation of chert – mudstone – peat association in Miocene coastal environments at the opening of the Sea of Japan. Sediment Geol 161:249–268 . doi: 10.1016/S0037-0738(03)00117-9
12. Vasconcelos C, McKenzie JA, Bernasconi S, et al (1995) Microbial mediation as a possible mechanism for natural dolomite formation at low temperatures. Nature 377:220–222
13. Wagner C, Togt C Van Der (1973) Holocene Sediment Types and Their Distribution Southern Persian Gulf. Shell Res 123–155
14. Yan J, Munnecke A, Steuber T, et al (2005) Marine Sepiolite in Middle Permian Carbonates of South China: Implications for secular variation of Phanerozoic seawater chemistry. J Sediment Petrol 75:328–338 . doi: 10.2110/jsr.2005.026
